# Supplementary material for: Synthesis of nanoparticles of zeolitic imidazolate framework ZIF-94 using inorganic deprotonators
Source: Royal Society of Chemistry journal article supplement (doi:10.1039/d0nj04402d), 2020-01-01
Supplement: d0nj04402d1.pdf [file d0nj04402d1.pdf]

## Synthesis of nanoparticles of zeolitic imidazolate framework ZIF-94 using inorganic deprotonators

Dharmjeet Madhav<sup>1,2</sup>, Magdalena Malankowska<sup>1,2,\*</sup>, Joaquín Coronas<sup>1,2,\*</sup>

<sup>1</sup>Instituto de Nanociencia y Materiales de Aragón (INMA), Universidad de Zaragoza-CSIC, 50018 Zaragoza, Spain.

<sup>2</sup>Chemical and Environmental Engineering Department, Universidad de Zaragoza, 50018 Zaragoza, Spain.

\* Corresponding authors' email: [magnal@unizar.es](mailto:magnal@unizar.es), [coronas@unizar.es](mailto:coronas@unizar.es)

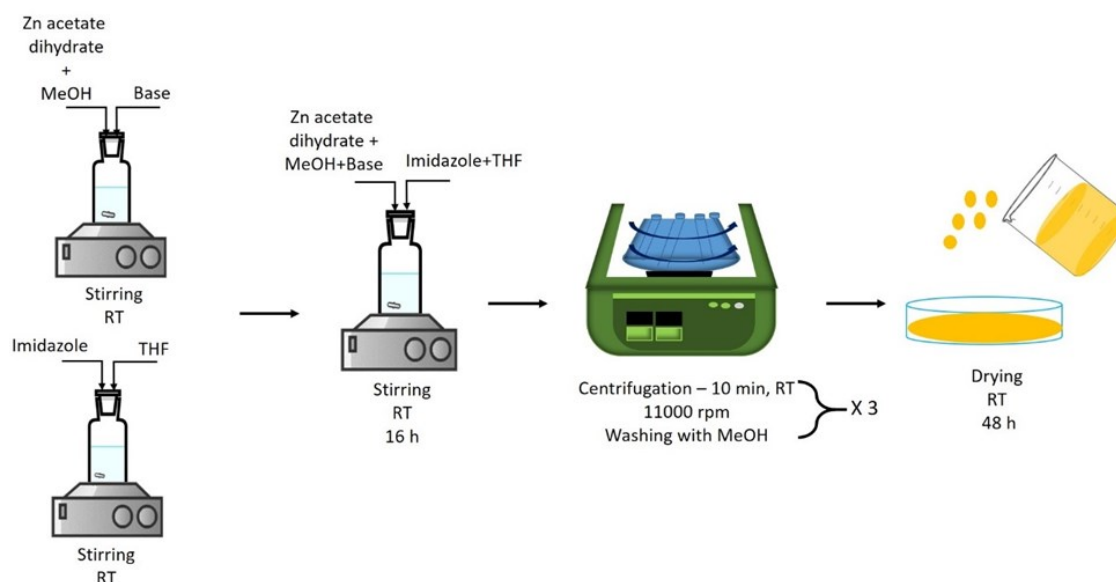

Fig. S1. Experimental scheme of the modified original method of ZIF-94 synthesis.

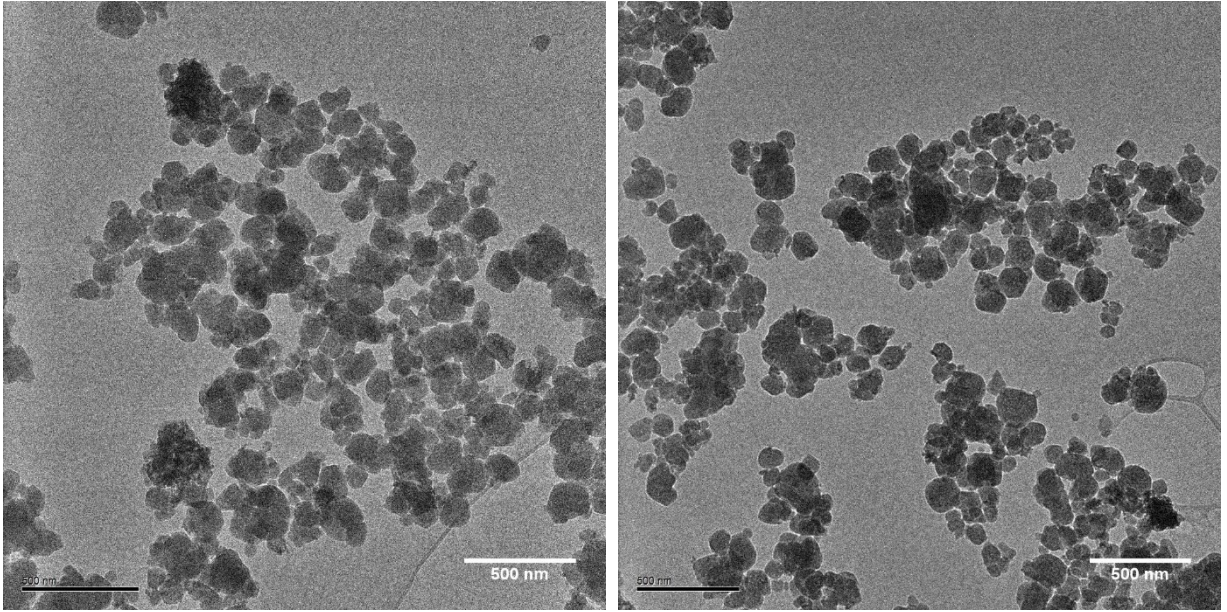

*Fig. S2. TEM images of product A4.*

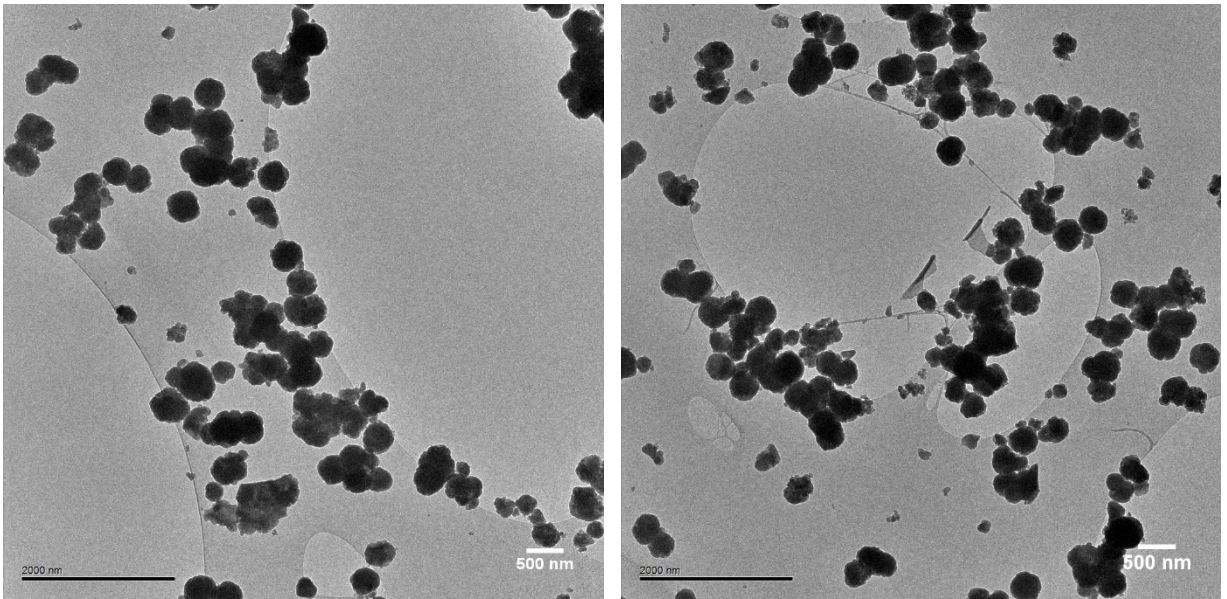

*Fig. S3. TEM images of product B.*

## Miller indices calculation

The interplanar distance  $d$ , in the set of  $(hkl)$  of the materials having cubic unit cell with lattice parameter  $a$  is obtained from the equation

$$\frac{1}{d^2} = \frac{h^2 + k^2 + l^2}{a^2}$$

Combining the above equation with Bragg's law ( $\lambda = 2d \sin \theta$ ), gives

$$\frac{1}{d^2} = \frac{h^2 + k^2 + l^2}{a^2} = \frac{4 \sin^2 \theta}{\lambda^2}$$

Rearranging gives

$$\sin^2 \theta = \left( \frac{\lambda^2}{4a^2} \right) (h^2 + k^2 + l^2)$$

Where,  $\frac{\lambda^2}{4a^2}$  is a constant and  $\sin^2 \theta$  is proportional to the value of  $h^2 + k^2 + l^2$ , which can take only integral values except few such as 7, 15 for which the combination of  $hkl$  is not possible. Taking all these into consideration observed value of  $\sin^2 \theta$  satisfies the  $hkl$  values for body centered cubic structure.

Table S1. Miller indices calculation from observed value of  $\sin^2 \theta$

| Peak position<br>(2theta, °) | $\sin^2 \theta$ | $\frac{\sin^2 \theta}{\sin^2 \theta_{min}}$ | $\frac{\sin^2 \theta}{\sin^2 \theta_{min}} \times 2$ | $h^2 + k^2 + l^2$ | $hkl$ |
|------------------------------|-----------------|---------------------------------------------|------------------------------------------------------|-------------------|-------|
| 7.49607                      | 0.00427         | 1                                           | 2                                                    | 2                 | 110   |
| 10.59482                     | 0.00852         | 1.99                                        | 3.99                                                 | 4                 | 200   |
| 12.9714                      | 0.01276         | 2.99                                        | 5.97                                                 | 6                 | 211   |
| 14.98033                     | 0.01699         | 3.98                                        | 7.95                                                 | 8                 | 220   |
| 16.73979                     | 0.02119         | 4.96                                        | 9.92                                                 | 10                | 310   |
| 18.36299                     | 0.02546         | 5.96                                        | 11.9                                                 | 12                | 222   |
| 19.85083                     | 0.02971         | 6.95                                        | 13.9                                                 | 14                | 321   |
| 21.24348                     | 0.03398         | 7.95                                        | 15.9                                                 | 16                | 400   |
| 23.77762                     | 0.04244         | 9.93                                        | 19.9                                                 | 20                | 420   |

## Particle size calculation through Scherrer equation

Table S2. The particle size and average particle size of all the samples calculated using Scherrer equation, at the values of 2-theta for different peaks and K equals to 0.94

|                 | Peak position<br>(2theta) | FWHM | Crystal Size (nm)<br>( $K\lambda/\beta \cos \theta$ ) | Average Size<br>(nm) |
|-----------------|---------------------------|------|-------------------------------------------------------|----------------------|
| Original Method | 7.48                      | 0.23 | 36.29                                                 | 31±4                 |
|                 | 10.56                     | 0.28 | 29.75                                                 |                      |
|                 | 12.95                     | 0.25 | 32.83                                                 |                      |
|                 | 14.97                     | 0.26 | 31.82                                                 |                      |
|                 | 16.73                     | 0.33 | 25.71                                                 |                      |
| Product A.1     | 7.47                      | 0.25 | 32.60                                                 | 31±1                 |
|                 | 10.53                     | 0.28 | 30.19                                                 |                      |
|                 | 12.91                     | 0.27 | 31.24                                                 |                      |
|                 | 14.92                     | 0.28 | 29.94                                                 |                      |
|                 | 16.68                     | 0.29 | 29.85                                                 |                      |
| Product A.2     | 7.47                      | 0.28 | 29.85                                                 | 29±1                 |
|                 | 10.53                     | 0.30 | 28.04                                                 |                      |
|                 | 12.91                     | 0.29 | 29.21                                                 |                      |
|                 | 14.92                     | 0.29 | 29.18                                                 |                      |
|                 | 18.30                     | 0.29 | 29.13                                                 |                      |
| Product A.3     | 7.51                      | 0.25 | 33.20                                                 | 33±1                 |
|                 | 10.58                     | 0.26 | 31.58                                                 |                      |
|                 | 12.96                     | 0.25 | 33.33                                                 |                      |
|                 | 14.96                     | 0.25 | 33.33                                                 |                      |
|                 | 18.33                     | 0.25 | 33.90                                                 |                      |
| Product A.4     | 7.46                      | 0.22 | 38.26                                                 | 38±2                 |
|                 | 12.92                     | 0.21 | 38.80                                                 |                      |
|                 | 14.93                     | 0.21 | 39.76                                                 |                      |
|                 | 18.31                     | 0.21 | 39.65                                                 |                      |
|                 | 19.78                     | 0.24 | 34.45                                                 |                      |
| Product B       | 7.60                      | 0.39 | 21.17                                                 | 16±3                 |
|                 | 10.68                     | 0.49 | 16.94                                                 |                      |
|                 | 13.07                     | 0.52 | 15.98                                                 |                      |
|                 | 15.09                     | 0.56 | 15.04                                                 |                      |
|                 | 19.91                     | 0.73 | 11.53                                                 |                      |

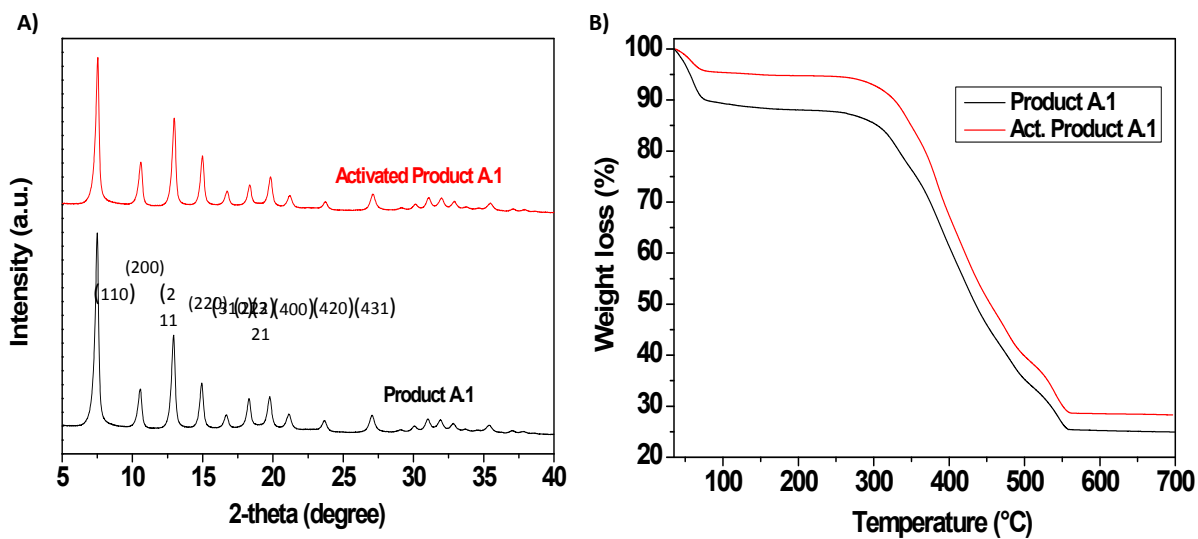

Fig. S4. XRD pattern and TGA curve of product A.1 activated at 200 °C for 8 h compared with that of non-activated product A.1

Table S3. Pore volume of all the samples calculated using  $N_2$  adsorption data

| Sample          | Pore Volume ( $cm^3/g$ ) |
|-----------------|--------------------------|
| Original Method | 0.23                     |
| Product A.1     | 0.09                     |
| Product A.2     | 0.16                     |
| Product A.3     | 0.19                     |
| Product A.4     | 0.16                     |
| Product B       | 0.16                     |
